# Supplementary material for: Is It Possible to Have Home E-Monitoring of Pulmonary Function in Our Patients with Duchenne Muscular Dystrophy in the COVID-19 Pandemic?—A One Center Pilot Study
Source: Int J Environ Res Public Health. 2021 Aug 26;18(17):8967. doi: 10.3390/ijerph18178967 (PMC8430665; doi:10.3390/ijerph18178967)
Supplement: Supplementary file 1 [file ijerph-18-08967-s001.zip › ijerph-1341493-supplementary.pdf]

**Table S1.** Survey of satisfaction and possibility of home e-monitoring in DMD patients.

|                                                                                                                             |   |          |   |   |
|-----------------------------------------------------------------------------------------------------------------------------|---|----------|---|---|
| <b>Home AioCare e-spirometry</b>                                                                                            |   |          |   |   |
| 1. Mark on the scale how you rate the monitoring of lung function with the home spirometer.                                 |   |          |   |   |
| 1                                                                                                                           | 2 | 3        | 4 | 5 |
| the worst                                                                                                                   |   | the best |   |   |
| 2. Mark on the scale how you assess the comprehensibility of the instructions received for self-measurements of spirometry. |   |          |   |   |
| 1                                                                                                                           | 2 | 3        | 4 | 5 |
| the worst                                                                                                                   |   | the best |   |   |
| 3. If you have not been able to perform spirometric measurements regularly, what was the most common reason for this?       |   |          |   |   |
| - Correct blowing into the spirometer is too difficult for me                                                               |   |          |   |   |
| - I don't have time to blow into the spirometer                                                                             |   |          |   |   |
| - I have no motivation for this assessment                                                                                  |   |          |   |   |
| - I feel unwell                                                                                                             |   |          |   |   |
| - I forget to take the measurements                                                                                         |   |          |   |   |
| - other reasons: .....                                                                                                      |   |          |   |   |
| 4. What would be helpful for you to take measurements every day?                                                            |   |          |   |   |
| - reminder sent via SMS                                                                                                     |   |          |   |   |
| - weekly online appointment with your doctor                                                                                |   |          |   |   |
| - weekly report of my results with interpretation                                                                           |   |          |   |   |
| - I am not able to take measurements everyday                                                                               |   |          |   |   |

|                                                                            |
|----------------------------------------------------------------------------|
| - other: .....                                                             |
| <b>5.</b> Do you think that you benefit from home spirometry measurements? |
| YES NO                                                                     |
| <b>6.</b> If 'YES', the benefits are:                                      |
| - I can breathe easier                                                     |
| - I can clear my lungs easier                                              |
| - I feel more confident                                                    |
| - I like to use new electronic spirometer                                  |
| - I will not be afraid of performing spirometry in the hospital            |
| - other: .....                                                             |
